# Supplementary material for: Lens metabolomic profiling as a tool to understand cataractogenesis in Atlantic salmon and rainbow trout reared at optimum and high temperature
Source: PLoS One. 2017 Apr 18;12(4):e0175491. doi: 10.1371/journal.pone.0175491 (PMC5395160; doi:10.1371/journal.pone.0175491)
Supplement: S3 Table — Biochemicals that were significantly different in lenses with different cataract scores in rainbow trout lenses. The data are presented as mean values of each metabolite per cataract score 0–2. Red colour indicates a significantly higher level and green colour indicates a significantly lower level of the metabolite (contrasts) (p<0.05). (XLSX) [file pone.0175491.s003.xlsx]

## Sheet: Ark1
SUPER PATHWAY	SUB PATHWAY	BIOCHEMICAL NAME	Mean relative values			Contrasts			One Way ANOVA
			T 0	T 1	T 2	T-CAT 1 T-CAT 0	T-CAT 2 T-CAT 0	T-CAT 2 T-CAT 1	T-Cataract Effect
Carbohydrate	Fructose, mannose, galactose, starch, and sucrose metabolism	fructose	0.666968	1.05555	1.88532	1.58	2.83	1.79	P<0.001
	Glycolysis, gluconeogenesis, pyruvate metabolism	glycerate	0.736249	0.48895	1.26979	0.66	1.72	2.6	P< 0.001
		glucose	0.72434	6.4878	1.26125	8.96	1.74	0.19	P=0.045
Lipid	Carnitine metabolism	stearoylcarnitine	0.462803	0.257108	1.69561	0.56	3.66	6.59	P=0.02
	Monoacylglycerol	1-docosahexaenoylglycerol (1-monodocosahexaenoin)	0.227538	0.474933	0.712995	2.09	3.13	1.5	P=0.04
